# Supplementary material
Source: MDPI journal article supplement (https://www.mdpi.com/2073-4395/12/5/1173)
Supplement: s1 [file s1]

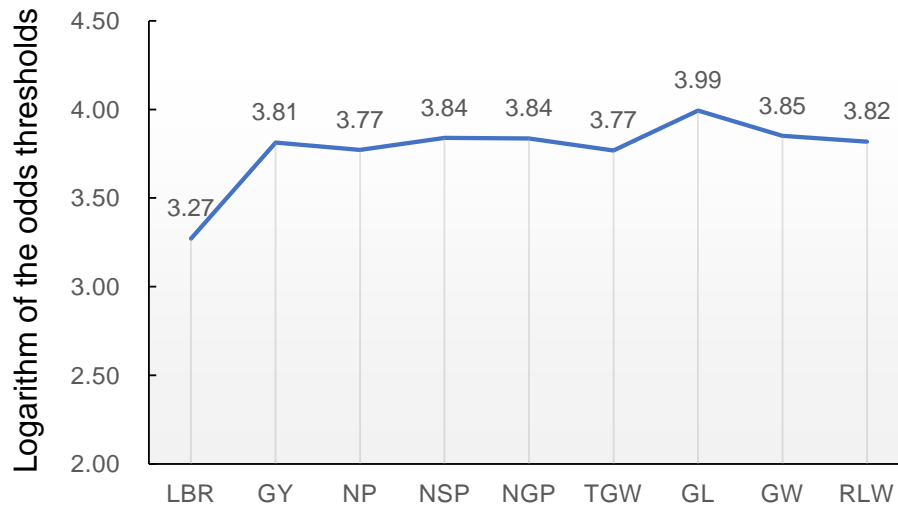

Figure S1. The LOD thresholds of the QTL for the LBR and the eight yield traits calculated with 1,000 permutation tests ( $p < 0.05$ ).

LBR, score for leaf blast resistance; GY, grain yield per plant (g); NP, number of panicles per plant; NSP, number of spikelets per panicle; NGP, number of grains per panicle; TGW, 1,000-grain weight (g); GL, grain length (mm); GW, grain width (mm); RLW, ratio of grain length to grain width.
